# Supplementary material
Source: HighWire-hosted journal article supplement (https://bmjopen.bmj.com/content/12/4/e057797)
Supplement: inline-supplementary-material-3 [file inline-supplementary-material-3.pdf]

**Supplement 3: Evaluation of the quality of evidence using the GRADE guidelines**

| STUDY                         | DESIGN                      | QUALITY                | CONSISTENCY                | DIRECTNESS                    | MODIFYING FACTORS                              | POPULATION                  |
|-------------------------------|-----------------------------|------------------------|----------------------------|-------------------------------|------------------------------------------------|-----------------------------|
| <b>HIV TESTING</b>            |                             |                        |                            |                               |                                                |                             |
| <b>DOHERTY, ET AL.</b>        | Randomized controlled trial | No serious limitation  | No important inconsistency | Direct                        | Cluster randomized                             | 4,154 adolescent and adults |
| <b>ROTHERAM-BORRUS, ET AL</b> | Randomized controlled trial | No serious limitation  | No important inconsistency | No effect of intervention     | Cluster randomized 2 sites only                | 142 adolescent males        |
| <b>HERSHOW, ET AL.</b>        | Observational               | No control group       | No important inconsistency | Direct without comparison     | None                                           | 1,953 adolescent females    |
| <b>SHANAUBE, ET AL.</b>       | Randomized clinical trial   | Single arm reported    | No important inconsistency | Direct without comparison     | None                                           | 11,175 adolescents          |
| <b>PETTIFOR, ET AL.</b>       | Randomized controlled trial | No serious limitation  | No important inconsistency | Direct                        | Decreased effect over time                     | 287 young women             |
| <b>ADHERENCE</b>              |                             |                        |                            |                               |                                                |                             |
| <b>BHANA, ET AL.</b>          | Randomized controlled trial | No serious limitation  | No important inconsistency | Indirect measure of adherence | Self-reported adherence                        | 65 adolescents              |
| <b>CLUVER, ET AL.</b>         | Observational               | No serious limitation  | No important inconsistency | Indirect measure of adherence | Self-reported adherence                        | 1,059 adolescents           |
| <b>RETENTION IN CARE</b>      |                             |                        |                            |                               |                                                |                             |
| <b>FATTI, ET AL.</b>          | Observational               | No serious limitations | No important inconsistency | Direct                        | None                                           | 6,706 adolescents           |
| <b>ZANONI, ET AL.</b>         | Observational               | No serious limitation  | No important inconsistency | Direct                        | Large effect size<br>Propensity score matching | 254 adolescents             |
